# Supplementary material for: General practitioners and sickness certification for injury in Australia
Source: PubMed Central journal article supplement (PMC4537596; doi:10.1186/s12875-015-0307-9), 2015-08-15
Supplement: 12875_2015_307_MOESM1_ESM.pdf [file 12875_2015_307_MOESM1_ESM.pdf]

**Privacy**

The TAC will retain the information provided and may use or disclose it to make further inquiries or assist in the ongoing management of the claim or any claim for common law damages. The TAC may also be required by law to disclose this information.

Without this information, the TAC may be unable to determine entitlements or assess whether treatment is reasonable and may not be able to approve further benefits and treatment. If you require further information about our privacy policy, please call the TAC on 1300 654 329 or visit our website at [www.tac.vic.gov.au](http://www.tac.vic.gov.au)

**Patient details**

Name

Address

Post Code

Claim number  Date of birth  /  /  Date of accident  /  /

Date examined  /  /  Date first examined  /  /

**Current clinical diagnosis**

When examined the patient was found to have the following accident-related conditions. *Attach additional notes if required*

| Condition | Left | Right |
|-----------|------|-------|
| 1.        |      |       |
| 2.        |      |       |
| 3.        |      |       |
| 4.        |      |       |
| 5.        |      |       |

Are these conditions consistent with the patient's description of the cause?  
 Yes  Uncertain

Did the client receive a head injury? If so, please state scores for:  
 ▪ GCS \_\_\_\_\_ PTA (days) \_\_\_\_\_

**Relevant past medical history as known**

Are you aware of any pre-accident injury, illness or condition that may impact on the treatment of, or recovery from, the injuries incurred in the transport accident?

Yes  No

*If yes, provide relevant clinical details of injury illness or condition*

**Capacity for work** *specify reason and restrictions in comments section below*

|                                                    | From | To |
|----------------------------------------------------|------|----|
| Expected to be fit for usual duties                |      |    |
| Fit for modified/alternative duties                |      |    |
| Unfit for any work duties and has no work capacity |      |    |

**Comments** *e.g. work restrictions, work capacity, need for support services*

**Provider details**

I certify that I have clinically examined this patient. The information and medical opinions contained in this certificate are, to the best of my knowledge, true and correct.

Provider name, address and phone no. *Use practice stamp where possible*

Signature

Days/hours available

Date

/  /

**Please attach any information that may be relevant.**
